# Supplementary material
Source: ML conference proceedings conference paper supplement (https://proceedings.neurips.cc/paper_files/paper/2017/hash/faafda66202d234463057972460c04f5-Abstract.html)
Supplement: Supplementary file [file faafda66202d234463057972460c04f5-Supplemental.zip]

---

# Supplementary Material: Cold-Start Reinforcement Learning with Softmax Policy Gradient

---

**Nan Ding**  
Google Inc.  
Venice, CA 90291  
dingnan@google.com

**Radu Soricut**  
Google Inc.  
Venice, CA 90291  
rsoricut@google.com

## 1 Bang-bang Rewarded SPG: Lemma 1

We provide here the proof for Lemma 1, as part of the derivation for the gradient computation method for the Bang-bang rewarded SPG method.

**Lemma 1** When  $w_t^i = 0$ ,

$$\sum_{\mathbf{z}^i} \tilde{q}_\theta(\mathbf{z}^i | \mathbf{x}^i, \mathbf{y}^i, \mathbf{w}^i) \frac{\partial}{\partial \theta} \log p_\theta(z_t^i | \mathbf{x}^i, \mathbf{z}_{1:t-1}^i) = 0.$$

**Proof** First of all,

$$\tilde{q}_\theta(z_t^i | \mathbf{x}^i, \mathbf{y}^i, \mathbf{z}_{1:t-1}^i, w_t^i) \propto \exp(\log p_\theta(z_t^i | \mathbf{z}_{1:t-1}^i, \mathbf{x}^i) + \Delta r_t^i), \quad (1)$$

where  $\Delta r_t^i = w_t^i \cdot (R(\mathbf{z}_{1:t}^i | \mathbf{y}^i) - R(\mathbf{z}_{1:t-1}^i | \mathbf{y}^i))$ . When  $w_t^i = 0$ ,  $\Delta r_t^i = 0$ , therefore,

$$\tilde{q}_\theta(z_t^i | \mathbf{x}^i, \mathbf{y}^i, \mathbf{z}_{1:t-1}^i, w_t^i) \propto \exp(\log p_\theta(z_t^i | \mathbf{z}_{1:t-1}^i, \mathbf{x}^i)) = p_\theta(z_t^i | \mathbf{z}_{1:t-1}^i, \mathbf{x}^i).$$

Therefore, the gradient component at time  $t$  of example  $i$  is:

$$\begin{aligned} & \sum_{\mathbf{z}^i} \tilde{q}_\theta(\mathbf{z}^i | \mathbf{x}^i, \mathbf{y}^i, \mathbf{w}^i) \frac{\partial}{\partial \theta} \log p_\theta(z_t^i | \mathbf{x}^i, \mathbf{z}_{1:t-1}^i) \\ &= \sum_{\mathbf{z}_{1:t}^i} \tilde{q}_\theta(\mathbf{z}_{1:t}^i | \mathbf{x}^i, \mathbf{y}^i, \mathbf{w}^i) \frac{\partial}{\partial \theta} \log p_\theta(z_t^i | \mathbf{x}^i, \mathbf{z}_{1:t-1}^i) \\ &= \sum_{\mathbf{z}_{1:t-1}^i} \tilde{q}_\theta(\mathbf{z}_{1:t-1}^i | \mathbf{x}^i, \mathbf{y}^i, \mathbf{w}^i) \sum_{z_t^i} \tilde{q}_\theta(z_t^i | \mathbf{x}^i, \mathbf{y}^i, \mathbf{z}_{1:t-1}^i, w_t^i) \frac{\partial}{\partial \theta} \log p_\theta(z_t^i | \mathbf{x}^i, \mathbf{z}_{1:t-1}^i) \\ &= \sum_{\mathbf{z}_{1:t-1}^i} \tilde{q}_\theta(\mathbf{z}_{1:t-1}^i | \mathbf{x}^i, \mathbf{y}^i, \mathbf{w}^i) \sum_{z_t^i} p_\theta(z_t^i | \mathbf{x}^i, \mathbf{z}_{1:t-1}^i) \frac{\partial}{\partial \theta} \log p_\theta(z_t^i | \mathbf{x}^i, \mathbf{z}_{1:t-1}^i) \\ &= \sum_{\mathbf{z}_{1:t-1}^i} \tilde{q}_\theta(\mathbf{z}_{1:t-1}^i | \mathbf{x}^i, \mathbf{y}^i, \mathbf{w}^i) \sum_{z_t^i} \frac{\partial}{\partial \theta} p_\theta(z_t^i | \mathbf{x}^i, \mathbf{z}_{1:t-1}^i) \\ &= \sum_{\mathbf{z}_{1:t-1}^i} \tilde{q}_\theta(\mathbf{z}_{1:t-1}^i | \mathbf{x}^i, \mathbf{y}^i, \mathbf{w}^i) \underbrace{\frac{\partial}{\partial \theta} \sum_{z_t^i} p_\theta(z_t^i | \mathbf{x}^i, \mathbf{z}_{1:t-1}^i)}_{= \frac{\partial}{\partial \theta} 1 = 0} = 0. \end{aligned}$$

■

## 2 Algorithm 1: Gradient for the Bang-bang Rewarded Softmax Value Function

The gradient computation for the Bang-bang Rewarded Softmax Value Function is formulated in Algorithm 1.

---

### Algorithm 1: GRADIENT FOR THE BANG-BANG REWARDED SOFTMAX VALUE FUNCTION

---

**Input:** Data point  $(\mathbf{x}^i, \mathbf{y}^i)$ , hyperparameter  $p_{drop}$ ,  $W$ ,  $J$ , model parameter  $\theta$ .

**Result:** Gradient of data point  $(\mathbf{x}^i, \mathbf{y}^i)$ :  $\frac{\partial}{\partial \theta} \tilde{L}_{BBSPG}^i(\theta)$ .

```

 $\frac{\partial}{\partial \theta} \tilde{L}_{BBSPG}^i(\theta) = 0$ 
for  $j \in 1, \dots, J$  do
     $\mathbf{z}^{ij} \leftarrow \emptyset$ 
    for  $t \in 1, \dots, T$  do
        Sample  $\mu_t^{ij} \sim U[0, 1]$ 
        if  $\mu_t^{ij} > p_{drop}$  then
             $\Delta r_t^{ij} = W \left( R(\mathbf{z}_{1:t}^{ij} | \mathbf{y}^i) - R(\mathbf{z}_{1:t-1}^{ij} | \mathbf{y}^i) + \text{DUP}_t^{ij} + \text{EOS}_t^{ij} \right)$ 
            Sample  $z_t^{ij} \sim \exp \left( \log p_\theta(z_t^{ij} | \mathbf{z}_{1:t-1}^{ij}, \mathbf{x}^i) + \Delta r_t^{ij} \right) / Z$ 
             $\frac{\partial}{\partial \theta} \tilde{L}_{BBSPG}^i(\theta) = \frac{\partial}{\partial \theta} \tilde{L}_{BBSPG}^i(\theta) - \frac{\partial}{\partial \theta} \log p_\theta(z_t^{ij} | \mathbf{x}^i, \mathbf{z}_{1:t-1}^{ij})$ 
        else
            Sample  $z_t^{ij} \sim p_\theta(z_t^{ij} | \mathbf{z}_{1:t-1}^{ij}, \mathbf{x}^i)$ 
        end
         $\mathbf{z}^{ij} \leftarrow \mathbf{z}^{ij} \cup \{z_t^{ij}\}$ 
    end
end

```

---

The reward functions used by the algorithm above are the ones discussed in Section 4 of the main paper. We extend that discussion in the section below.

## 3 Reward Functions for the SPG Method

### 3.1 Main Reward Function

In our experiments, the main reward metric is an average over ROUGE-1, ROUGE-2, and ROUGE-3 F1 scores. We choose ROUGE- $n$  [2] based on its good performance as an evaluation metric for both summarization and image-captioning, as well as because it is more computationally efficient compared to other scores such as CIDEr [4] or SPICE [1].

The reason we average up to  $n = 3$  (instead of just 2) is illustrated in the following target example:

$$\text{a man is standing on a street } \langle /S \rangle \quad (2)$$

In the above sentence, the word 'a' appears twice. When using a ROUGE average up to  $n = 2$  as the reward metric, for  $z_{t-1} = \text{'a'}$ , both words 'man' and 'street' have identical reward increments. Therefore, this reward metric cannot distinguish between them. More generally, if the metric used does not account for n-grams longer than 2, it is suboptimal for decisions following common words (like 'the', 'of', or 'a').

### 3.2 ROUGE-L as a Reward Function

The ROUGE-L metric [2] also cannot be applied as the main reward metric by itself. Using Example (2) above, when  $\mathbf{z}_{1:t-1} = \text{'a'}$ , all the remaining target words have identical reward increments under ROUGE-L, because the length of the longest-common-subsequences is the same for all (i.e., 2). Furthermore, if  $\mathbf{z}_{1:t-1} = \text{'a street'}$ , all words (inside or outside the target) except ' $\langle /S \rangle$ ' have a 0 reward increment value because it would not improve the length of the longest-common-subsequence.

Although not attempted in this paper, one may combine the ROUGE-L metric with other metrics, such as the one in Section 3.1 above. A similar proposal, albeit in a more traditional PG setting, has been made in [3], taking advantage of the additional signal provided by various metrics.

### 3.3 EOS Reward Function

In the main paper, we introduce an EOS reward function which negatively rewards the end-of-sentence symbol when the length of the output sequence is less than the length of the ground-truth target sequence  $|y^i|$ :

$$\text{EOS}_t^i = \begin{cases} -1 & \text{if } z_t^i = \text{</S> and } t < |y^i|, \\ 0 & \text{otherwise.} \end{cases}$$

We illustrate the reason for this reward function using Example (2) again. If  $z_{1:t-1} = \text{'a street'}$ , then the word with the most reward increment is  $\text{'</S>'}$ . However, target sequence  $z = \text{'a street </S>'}$  is too short and misses a lot information, since there are five remaining words in the ground-truth target that have not been exploited. The EOS function encourages the generation of longer sequences, by correcting the bias introduced by the greediness of the forward-pass sampling step.

### 3.4 Before/After Examples when using the DUP Reward Function

The DUP function penalizes consecutive tokens in the generated sequence, which helps alleviating "stuttering" in the model output. The use of the DUP function helps improving the ROUGE-L score for about 0.1 points on the Gigaword dataset. Although without a significant boost on the ROUGE-L score, we notice clear differences before and after applying the DUP function, as the examples in Table 1 help illustrating.

| Before                                                                        | After                                                       | Reference                                                              |
|-------------------------------------------------------------------------------|-------------------------------------------------------------|------------------------------------------------------------------------|
| bosnian pm's resignation provokes <b>political political political</b> crisis | bosnian pm's resignation provokes <b>political</b> turmoil  | prime minister's resignation throws bosnia into crisis with yugoslavia |
| <b>sandelin sandelin sandelin</b> wins spanish open                           | <b>sandelin</b> wins spanish open                           | sandelin wins spanish open eds: adds quotes from sandelin and spence   |
| credit markets subdued amid <b>stress stress</b> crisis                       | credit markets subdued amid <b>stress</b> fears             | difficult credit markets show strained banking system                  |
| spanish 'belle <b>rafael rafael</b> azcona dies at 81                         | spanish 'belle <b>rafael</b> azcona dies at 81              | spanish 'belle epoque' scriptwriter rafael azcona dies aged 81         |
| nigerian productivity award <b>licence licence</b>                            | nigerian productivity award <b>licence</b> can be withdrawn | productivity award can be revoked, says nigerian official              |
| sports column : the <b>big big big big big big big big</b> ap photo <UNK>     | sports column : the <b>big</b> league is a big place        | in the big 12, basketball does the muscle flexing                      |

Table 1: Examples of the impact of the DUP function on model output.

## References

- [1] Peter Anderson, Basura Fernando, Mark Johnson, and Stephen Gould. SPICE: semantic propositional image caption evaluation. In *ECCV*, 2016.
- [2] Chin-Yew Lin and Franz Josef Och. Automatic evaluation of machine translation quality using longest common subsequence and skip-bigram statistics. In *Proceedings of ACL*, 2004.
- [3] Siqi Liu, Zhenhai Zhu, Ning Ye, Sergio Guadarrama, and Kevin Murphy. Optimization of image description metrics using policy gradient methods. In *International Conference on Computer Vision (ICCV)*, 2017.
- [4] Ramakrishna Vedantam, C. Lawrence Zitnick, and Devi Parikh. Cider: Consensus-based image description evaluation. In *The IEEE Conference on Computer Vision and Pattern Recognition (CVPR)*, June 2015.
